# Supplementary material
Source: PubMed Central journal article supplement (PMC3124805)
Supplement: NIHMS303712-supplement-01.pdf [file NIHMS303712-supplement-01.pdf]

## METHODS

Primer pairs used to amplify NEMO coding region cDNA for sequencing, including the 3' UTR:

| Forward                 | Reverse               |
|-------------------------|-----------------------|
| TCACCAAACCTTGACTGCGCTCT | CCAGAGCCTGGCATTCTTAG  |
| AGGACAAGGCCTCTGTGAAA    | GACAGCTGGCCTTCAGTTTGC |
| GCCGAGCAGCACAAAGATT     | GGAGAGGAAAGCGCAGACT   |

Primer pairs used for 5' upstream genomic PCR for sequencing:

| Forward                  | Reverse                  |
|--------------------------|--------------------------|
| AACGGATACTACTCAGCAACACTG | CTGGAAGGGGGCAGTAAGTAC    |
| CCAGAAATGTTCTGAGGAAAGG   | CGTGTAATTTGAGATGAAGCCCTT |
| CGCACGATGTGGAAGAACTAATA  | AGACAACATCTGCCTATCGTCA   |
| TTTCTACTCCTCCCTCCTCCTC   | GAAGAGCCAACCTGTGTGAGATGG |

Sequencing primers for 5' upstream genomic sequencing:

|                       |                       |
|-----------------------|-----------------------|
| GGAGTCTCACTCTGTGCGGCC | CATGGTGAGACCCCGTTTC   |
| GCCAGGCAGTTAGGAAGC    | GACTGGTCTGCTGAGTCAC   |
| CACAAGGTGACTTAGTAGA   | CCATCATTGGGATGCGTCC   |
| CTAGGTCATGCTGAGCTTGT  | CGAGGCTCTCAGAGAGAGG   |
| TCAGAGTCTGGCTGTTAAG   | AGTGCTGGGATTACAGACGT  |
| CTCTTCTGAGGGGACCAG    | AGTCTCACTGCCCCATGG    |
| GGTGGCTCATGCCTGTCA    | CCCATGATGATGAATATGTG  |
| CCTGGAGCATGGGAGATG    | TGCTCTGCATCCCCAATT    |
| CCCACAGCTATGACACCG    | ATCGTTCTAGCAGTGGTGG   |
| CATTCACAGCTACCAACTTC  | CTCACCGCAACCTCCATC    |
| GTGGATTTGCCTGTTGTAGA  | ATGGATTCGCCATCAGCT    |
| CGTGTCAACCACTCTGC     | GGAGACTAGAAGTCCAAAACC |
| TTCCAGCCTGGAGCTAGG    |                       |

Primers for cDNA transcript PCR (adds BamHI site in forward primers and HindIII site on reverse):

Exon 1A forward: 5' ATGGATCCCATGGCCCTGTGATCCAG 3'

Exon 1B forward: 5' ATGGATCCGACACCGGAAGCCGGAAG 3'

Exon 1C forward: 5' ATGGATCCAGCCCGTTCTGCTCCG 3'

Exon 10 reverse: 5' ATAAGCTTCTCAATGCACTCCATGACATGTATC 3'

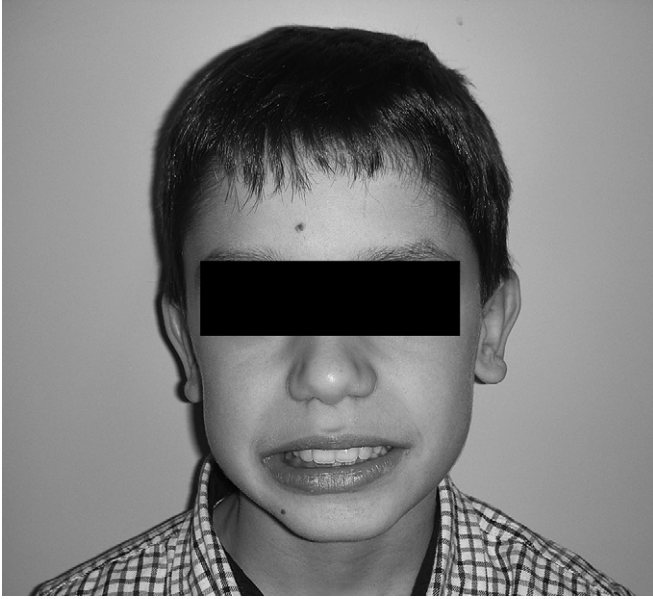

**FIG E1.** Normal ectodermal development in the index patient at 11 years of age. Notice normal dentition and hairline.

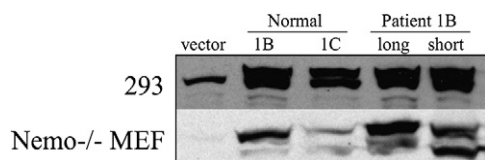

**FIG E2.** Western blot showing expression of NEMO cDNA isoforms amplified from normal and patient cells. NEMO cDNA using exons 1B and 1C were amplified from cDNA isolated from normal fibroblasts, and the misspliced 1B isoforms were amplified from cDNA isolated from patient fibroblasts. The PCR products were cloned into the pCMV-Tag4a vector and expressed in T293 HEK cells (*top*) or in NEMO<sup>-/-</sup> mouse embryonic fibroblasts (*bottom*). Note the presence of the endogenous NEMO band in T293 cells but not in NEMO-deficient murine embryonic fibroblasts (MEFs).

**TABLE E1.** Lymphocyte counts of the index patient

| Cell counts per mm <sup>3</sup>                                             | 11/2001                           | Normal range              |
|-----------------------------------------------------------------------------|-----------------------------------|---------------------------|
| Absolute lymphocyte count                                                   | 5140                              | 1700-6900                 |
| CD3                                                                         | 3084                              | 900-4500                  |
| CD4                                                                         | 596                               | 500-2400                  |
| CD8                                                                         | 709                               | 300-1600                  |
| CD16/CD56                                                                   | 1182                              | 100-1000                  |
| CD19                                                                        | 668                               | 200-2100                  |
| CD27 <sup>+</sup> IgD <sup>+</sup> IgM <sup>+</sup><br>(nonswitched memory) | 29 (4.4% of CD19 <sup>+</sup> )   | 30-98 (7% to 14%)         |
| CD27 <sup>+</sup> IgD <sup>-</sup> IgM <sup>-</sup><br>(switched memory)    | 10 (1.5% of CD19 <sup>+</sup> )   | 22-76 (5% to 12.3%)       |
| CD27 <sup>-</sup> IgD <sup>+</sup> IgM <sup>+</sup><br>(naive)              | 625 (93.6% of CD19 <sup>+</sup> ) | 260-716<br>(70.7% to 85%) |

These measurements were taken when the patient was first seen at 4 years of age. Similar numbers have been obtained on subsequent evaluations. Reference range values (10th-90th percentile) for B-cell subsets: Huck K, Feyen O, Ghosh S, Beltz K, Bellert S, Niehues T. Memory B-cells in healthy and antibody-deficient children. Clin Immunol 2009;131:50-9.

**TABLE E2.** Serum immunoglobulin levels from the index patient

| <b>Serum immunoglobulins (mg/dL)</b> | <b>11/2001</b> | <b>Normal range</b> |
|--------------------------------------|----------------|---------------------|
| IgG                                  | 653            | 441-1135            |
| IgG <sub>1</sub>                     | 369            | 360-810             |
| IgG <sub>2</sub>                     | 248            | 60-310              |
| IgG <sub>3</sub>                     | 38             | 9-160               |
| IgG <sub>4</sub>                     | 8              | 9-160               |
| IgA                                  | 901            | 22-159              |
| IgM                                  | 31             | 47-200              |

Immunoglobulin levels measured when the patient was first seen at age 4 years, before intravenous immunoglobulin therapy was initiated.

**TABLE E3.** Antibody response to immunization

| Serum titers                                | 6/2003 | 5/2004 | 1/2005 | 9/2006 | 6/2008 |
|---------------------------------------------|--------|--------|--------|--------|--------|
| Tetanus (IU/mL)                             | 0.2    | —      | —      | 0.09   | 0.1    |
| Measles (IU/mL)                             | —      | Absent | —      | Absent | Absent |
| Mumps (AU/mL)                               | —      | Absent | —      | Absent | Absent |
| Pneumococcus (mg/L)                         | 40     | —      | 150    | 90     | 30     |
| Hepatitis B virus surface antibody (mIU/mL) | —      | Absent | —      | Absent | Absent |

The patient received Measles/Mumps/Rubella vaccinations 8/1999 and 9/2005, tetanus 7/1998, 9/1998, 3/1999, 8/1999, 6/2003, and 12/2005, 23-valent pneumococcus vaccine 6/2003 and 12/2005, hepatitis B virus 7/1998, 9/1998, 3/1999 and 3/2007. Protective titers after immunization with tetanus toxoid and pneumococcus are >0.1 IU/mL and >60 mg/L, respectively. Dashes indicate the test was not done on that day.

**TABLE E4.** Proliferation of PBMCs, <sup>3</sup>H counts per minute

| <b>Stimulus</b> | <b>Patient</b> | <b>Healthy control</b> |
|-----------------|----------------|------------------------|
| Medium, day 3   | 455            | 316                    |
| PHA             | 33,376         | 34,506                 |
| PWM             | 25,564         | 36,794                 |
| Anti-CD3 (OKT3) | 25,267         | 34,111                 |
| Medium, day 6   | 282            | 187                    |
| Tetanus         | 2,165          | 9,601                  |

Measured 5/2006, blood sample was taken before intravenous immunoglobulin infusion. Cells were examined for proliferation to phytohemagglutinin (*PHA*), pokeweed mitogen (*PWM*), and anti-CD3 after 3 days of culture, and to tetanus after 6 days of culture.
